# Supplementary material for: LADON, a Natural Antisense Transcript of NODAL, Promotes Tumour Progression and Metastasis in Melanoma
Source: MDPI journal article supplement (doi:10.3390/ncrna9060071), 2023-11-15
Supplement: s1 [file s1]

Table S1 Tumour abbreviations

|      |                                                                  |
|------|------------------------------------------------------------------|
| CC   | Adrenocortical carcinoma                                         |
| BLCA | Bladder Urothelial Carcinoma                                     |
| BRCA | Breast invasive carcinoma                                        |
| CESC | Cervical squamous cell carcinoma and endocervical adenocarcinoma |
| CHOL | Cholangio carcinoma                                              |
| COAD | Colon adenocarcinoma                                             |
| DLBC | Lymphoid Neoplasm Diffuse Large B-cell Lymphoma                  |
| ESCA | Esophageal carcinoma                                             |
| GBM  | Glioblastoma multiforme                                          |
| HNSC | Head and Neck squamous cell carcinoma                            |
| KICH | Kidney Chromophobe                                               |
| KIRC | Kidney renal clear cell carcinoma                                |
| KIRP | Kidney renal papillary cell carcinoma                            |
| LAML | Acute Myeloid Leukemia                                           |
| LGG  | Brain Lower Grade Glioma                                         |
| LIHC | Liver hepatocellular carcinoma                                   |
| LUAD | Lung adenocarcinoma                                              |
| LUSC | Lung squamous cell carcinoma                                     |
| MESO | Mesothelioma                                                     |
| OV   | Ovarian serous cystadenocarcinoma                                |
| PAAD | Pancreatic adenocarcinoma                                        |
| PCPG | Pheochromocytoma and Paraganglioma                               |
| PRAD | Prostate adenocarcinoma                                          |
| READ | Rectum adenocarcinoma                                            |
| SARC | Sarcoma                                                          |
| SKCM | Skin Cutaneous Melanoma                                          |
| STAD | Stomach adenocarcinoma                                           |
| TGCT | Testicular Germ Cell Tumors                                      |
| THCA | Thyroid carcinoma                                                |
| THYM | Thymoma                                                          |
| UCEC | Uterine Corpus Endometrial Carcinoma                             |
| UCS  | Uterine Carcinosarcoma                                           |
| UVM  | Uveal Melanoma                                                   |
