# Supplementary material for: LADON, a Natural Antisense Transcript of NODAL, Promotes Tumour Progression and Metastasis in Melanoma
Source: MDPI journal article supplement (doi:10.3390/ncrna9060071), 2023-11-15
Supplement: s1 [file s1]

Table S2.The primers used for qRT-PCR, CRISPR/CAS9 genome editing and siRNA.

| Amplicon                       | Sequence (5'-3')                                                                                                                                                                                                                                                                                                           | Amplicon size |
|--------------------------------|----------------------------------------------------------------------------------------------------------------------------------------------------------------------------------------------------------------------------------------------------------------------------------------------------------------------------|---------------|
| CRISPR/CAS9 Exon 2 Deletion 5' | F- ATCCACTGCCACATCTGGGTGTTTT<br>R- ACCCAGATGTGGCAGTGGATCGGTG                                                                                                                                                                                                                                                               |               |
| CRISPR/CAS9 Exon 2 Deletion 3' | F- GACCAACCATGCATACATCCGTTTT<br>R- GGATGTATGCATGGTTGGTCCGGTG                                                                                                                                                                                                                                                               |               |
| ladon ΔE2detection             | F- ATCTTGGAAGGGGGACTGGAA<br>R- TCCTGGTACATTGGAGGTGCTT                                                                                                                                                                                                                                                                      | 1141- 445     |
| Nodal Exon2                    | N2F- CTGCTTAGAGCGGTTTCAGATG<br>N2R- CGAGAGGTTGGAGTAGAGCATAA                                                                                                                                                                                                                                                                | 223           |
| Nodal Exon 1-2                 | F- CAGACATCATCCGCAGCCTA<br>R- TGCCAGATCCTCTTGTTGGC                                                                                                                                                                                                                                                                         | 104           |
| Nodal Exon 2-3                 | F- AGCAGTACAACGCCTATCGC<br>R- AACAAAGTGAAGGGACTCGG                                                                                                                                                                                                                                                                         | 132           |
| LADON 5'                       | L1F- CAAAGCTAGAGCCCTGTCCC<br>L1R- AGGGCGAGTGTCTTAATCCT                                                                                                                                                                                                                                                                     | 130           |
| LADON 5'                       | L2F- TGGTACATTGGAGGTGCTTG<br>L2R- TGAGGGCGAGTGTCTTAATC                                                                                                                                                                                                                                                                     | 188           |
| LADON 3'                       | L4F- AAGCAAACGTCCAGTTCTGCC<br>L4R- TCACCCTCCTTCCTTCTTGGT                                                                                                                                                                                                                                                                   | 71            |
| RPL13                          | F- GGAAGTACCAGGCAGTGACAGC<br>R- CTTCTCGGCCTGTTCCGTAG                                                                                                                                                                                                                                                                       | 110           |
| siRNA LADON                    | 1) CAGCUAAUGAGGAGUCAAAUU<br>2) CAUUGGAGGUGCUUGAGU<br>3) ACAGGAACAUAGUCAUUUAUU                                                                                                                                                                                                                                              |               |
| probe set 220689_at            | CTCAGTCAGTGTCAACAACCACCATA<br>CAACCACCATAGCTCTTGCTGGAGG<br>CTTGCTGGAGGCCTTACCTTATATA<br>GATTTTCGAGTCCCTTTTAGAGATG<br>AGTAAACCTGGATTGCCCCAACTGC<br>AGCCCAGACTCCGAATTACTGTTCT<br>GTCCCCCTTCCAAGATAAATTGCAC<br>CTTGACAGCCAGAGGACAGTCAGT<br>AAATGTGATGAGTTGCATCTCCCCC<br>CTCCTCCCATACATGAAGTCTGGCC<br>CCCAGCCACTCGAGAATCATTGAA |               |
